# Supplementary material for: Upregulation of FABP7 inhibits acute kidney injury-induced TCMK-1 cell apoptosis via activating the PPAR gamma signalling pathway
Source: Royal Society of Chemistry journal article supplement (doi:10.1039/d0mo00056f), 2020-08-12
Supplement: d0mo00056f1.pdf [file d0mo00056f1.pdf]

## SUPPLEMENTARY INFORMATION

Supplementary Table S1. The expression of 289 overlapping genes based on GSE62732 and GSE44925 dataset.

| ID | Gene symbol | LogFC    |          |
|----|-------------|----------|----------|
|    |             | GSE62732 | GSE44925 |
| 1  | Dio1        | -2.55    | -3.04    |
| 2  | Akr1e1      | -2.59    | -1.08    |
| 3  | Wnk4        | -2.14    | -1.16    |
| 4  | Nek6        | 2.62     | 1.93     |
| 5  | Tmem53      | -1.92    | -1.54    |
| 6  | Usp2        | -3.20    | -1.68    |
| 7  | Clec2h      | -3.20    | -1.87    |
| 8  | Tmem174     | -4.33    | -2.14    |
| 9  | Fam81a      | -2.76    | -1.7     |
| 10 | Ptger3      | -3.69    | -1.37    |
| 11 | Flrt1       | -1.55    | -1.65    |
| 12 | Slc6a20b    | -3.46    | -1.88    |
| 13 | Myc         | 1.55     | 3.19     |
| 14 | Sord        | -2.42    | -1.12    |
| 15 | Rab11fip3   | -2.67    | -1.6     |
| 16 | Bsnd        | -1.50    | -2.73    |
| 17 | Tfap2b      | -2.59    | -1.05    |
| 18 | Slc2a4      | -1.94    | -1.76    |
| 19 | Acss2       | -3.92    | -1.63    |
| 20 | Slc13a3     | -2.32    | -2.23    |
| 21 | Pm20d1      | -3.78    | -1.7     |
| 22 | Apeh        | -1.24    | -1.34    |
| 23 | Nox4        | -4.32    | -1.17    |
| 24 | Gcdh        | -2.63    | -1.07    |
| 25 | Sardh       | -4.05    | -1.42    |
| 26 | Sfrp1       | -3.55    | -2.86    |
| 27 | Arhgap24    | -2.83    | -1.15    |
| 28 | Rab17       | -4.21    | -1.09    |
| 29 | Igfbp4      | -1.57    | -1.26    |
| 30 | Fgf9        | -2.33    | -1.07    |
| 31 | Glod5       | -4.26    | -1.08    |
| 32 | Map3k7cl    | -1.49    | -2.31    |
| 33 | Enpp3       | -2.63    | -1.44    |
| 34 | Papss2      | -2.55    | -1.98    |
| 35 | Chrna4      | -2.01    | -2.41    |
| 36 | Nfia        | -2.75    | -1.15    |
| 37 | Slc15a2     | -3.46    | -1.98    |
| 38 | Cyr61       | -3.15    | 2.67     |

|    |                 |       |       |
|----|-----------------|-------|-------|
| 39 | Cyp2a5///Cyp2a4 | -4.23 | 1.48  |
| 40 | Lrp8            | 2.42  | 1.08  |
| 41 | Cckar           | -3.38 | -2.04 |
| 42 | Hao             | -2.16 | -1.63 |
| 43 | Foxq1           | -2.14 | -1.36 |
| 44 | Hpd             | -4.43 | -3.42 |
| 45 | Gstm7           | -1.81 | -1.17 |
| 46 | Sim1            | -1.98 | -1.18 |
| 47 | Ehd3            | -2.03 | -1.1  |
| 48 | Mthfd1          | -1.89 | -1.59 |
| 49 | Bphl            | -2.91 | -1.68 |
| 50 | Hlf             | -2.46 | -2.02 |
| 51 | Itga1           | -2.55 | -1.1  |
| 52 | Pdk2            | -2.25 | -1.54 |
| 53 | Gatm            | -1.65 | -2.28 |
| 54 | Acsml           | -3.99 | -2.35 |
| 55 | Slc12a1         | -3.25 | -2.52 |
| 56 | Cldn10          | -2.45 | -1.98 |
| 57 | Cyp4a14         | -4.89 | -2.38 |
| 58 | Nat8f1          | -4.27 | -2.59 |
| 59 | Gpm6a           | -3.44 | -1.17 |
| 60 | Me3             | -2.79 | -1.37 |
| 61 | P3h2            | -3.18 | -1.82 |
| 62 | Slc2a13         | -1.83 | -1.14 |
| 63 | Cmah            | 2.37  | -2.09 |
| 64 | Gent1           | -1.56 | -1.73 |
| 65 | Sostdc1         | -1.44 | -2.49 |
| 66 | Akr1c21         | -4.76 | -1.38 |
| 67 | Kcnj1           | -3.23 | -2.17 |
| 68 | Fads2           | -2.45 | -1.7  |
| 69 | Wwtr1           | -2.18 | 1.01  |
| 70 | Slc23a1         | -2.31 | -1.24 |
| 71 | Rad18           | 1.65  | 1.23  |
| 72 | Ccdc189         | -1.50 | -1.19 |
| 73 | Slc26a4         | -2.05 | -1.37 |
| 74 | Rdh16           | -3.00 | -1.82 |
| 75 | Abat            | -2.71 | -1.56 |
| 76 | Hgd             | -4.61 | -1.13 |
| 77 | Fmo1            | -4.34 | -1.14 |
| 78 | Slc25a10        | -3.08 | -1.06 |
| 79 | Slc12a6         | 2.95  | -1.05 |
| 80 | Calb1           | -3.60 | -1.73 |
| 81 | Tcea3           | -1.72 | -1.81 |

|     |               |       |       |
|-----|---------------|-------|-------|
| 82  | Fut9          | -3.59 | -1.83 |
| 83  | Slc5a1        | -2.04 | -1.23 |
| 84  | Galm          | -2.16 | -1.46 |
| 85  | Epb41l3       | -3.27 | -1.55 |
| 86  | Tmem207       | -3.09 | -3.15 |
| 87  | Apela         | -1.92 | -1.66 |
| 88  | Acy1          | -1.14 | -2.22 |
| 89  | Lrrc66        | -2.45 | -2.77 |
| 90  | Tinag         | -3.35 | -1.18 |
| 91  | Glyctk        | -3.02 | -1.95 |
| 92  | Ttc36         | -3.20 | -1.73 |
| 93  | Aldh1a1       | -1.98 | 1.24  |
| 94  | Aqp11         | -3.16 | -1.35 |
| 95  | Abhd14a       | -2.39 | -1.77 |
| 96  | Acsm5         | -3.25 | -2.59 |
| 97  | Mgam          | -2.93 | -2.03 |
| 98  | Pdk4          | -3.21 | 3.37  |
| 99  | Galnt11       | -2.62 | -2.29 |
| 100 | Stxbp4        | -1.41 | -1.35 |
| 101 | Rap2b         | 1.93  | 1.08  |
| 102 | Gsta4         | -2.74 | -1.37 |
| 103 | Dcaf11        | -1.52 | -1.17 |
| 104 | Igfbp5        | -2.17 | -1.31 |
| 105 | Cdk11         | -1.84 | -2.06 |
| 106 | Aamdc         | -1.76 | -1.08 |
| 107 | Csf1r         | 1.23  | -1.03 |
| 108 | Mpc2          | -1.56 | -1.06 |
| 109 | Slc4a1        | -3.35 | -2.45 |
| 110 | Pck1          | -4.44 | -1.04 |
| 111 | Ppp1r1a       | -1.98 | -1.96 |
| 112 | B3gat2        | -2.05 | -2.97 |
| 113 | Egfl6         | -1.78 | -1.78 |
| 114 | Glb11         | -1.85 | -1.24 |
| 115 | Pprc1         | 1.61  | 1.13  |
| 116 | Bhmt2         | -2.81 | -1.67 |
| 117 | Aqp6          | -1.38 | -1.69 |
| 118 | Rhbg          | -2.48 | -1.74 |
| 119 | Sema3c        | -2.70 | 2.15  |
| 120 | Frzb          | -2.14 | 1.83  |
| 121 | D630023F18Rik | -3.73 | -1.62 |
| 122 | Slc5a9        | -2.21 | -1.56 |
| 123 | Fam13a        | -3.02 | -1.54 |
| 124 | Cyp2c44       | -2.47 | -2.9  |

|     |          |       |       |
|-----|----------|-------|-------|
| 125 | Mccc2    | -2.39 | -1.62 |
| 126 | Timd2    | -2.78 | 3.39  |
| 127 | Cdt1     | 2.28  | 1.15  |
| 128 | Fras1    | -2.46 | -1.19 |
| 129 | Morn2    | -1.92 | -1.55 |
| 130 | Slc22a7  | -2.68 | -2.67 |
| 131 | Mep1b    | -2.83 | -1.8  |
| 132 | Cyp2d26  | -4.95 | -1.83 |
| 133 | Cyp24a1  | -3.50 | -1.66 |
| 134 | Slc16a9  | -4.34 | -1.43 |
| 135 | Sult1c2  | -2.66 | -1.93 |
| 136 | Ranbp31  | -2.55 | -2.26 |
| 137 | Pgam2    | -2.90 | -1.47 |
| 138 | Bdh2     | -2.73 | -1.19 |
| 139 | Kl       | -4.17 | -1.83 |
| 140 | Cyp4a12a | -3.73 | 2.98  |
| 141 | Pdzk1    | -4.04 | -2    |
| 142 | Pesk6    | -1.84 | -1.05 |
| 143 | Pxmp2    | -2.75 | -1.59 |
| 144 | Dao      | -3.44 | -1.29 |
| 145 | Hint2    | -1.78 | -1.08 |
| 146 | Pkp2     | -3.06 | 1.02  |
| 147 | Cmb1     | -2.17 | -1.95 |
| 148 | Nmrk1    | -3.25 | -1.46 |
| 149 | Aadat    | -3.51 | -2.48 |
| 150 | Rnf152   | -3.96 | -1.15 |
| 151 | Abhd14b  | -3.35 | -1.5  |
| 152 | Lrp2     | -4.79 | -1.41 |
| 153 | Slc6a4   | -1.42 | -1.82 |
| 154 | Stradb   | -2.14 | -1.03 |
| 155 | Plekha6  | -2.30 | -1.15 |
| 156 | Slc22a8  | -4.74 | -1.27 |
| 157 | Pah      | -4.15 | -2.12 |
| 158 | Lhx1     | 2.50  | -1.01 |
| 159 | Slc1a1   | -3.80 | -1.13 |
| 160 | Il4ra    | 1.31  | 1.13  |
| 161 | Id4      | -3.11 | -1.51 |
| 162 | Slc44a4  | -2.45 | -1.16 |
| 163 | Gas2l3   | 2.65  | 1.48  |
| 164 | Pdzk1ip1 | -3.39 | -1.17 |
| 165 | Keg1     | -4.35 | -1.44 |
| 166 | Ceacam2  | -2.39 | -2.98 |
| 167 | Aspa     | -3.22 | -1.77 |

|     |               |       |       |
|-----|---------------|-------|-------|
| 168 | Scp2          | -1.80 | -1.06 |
| 169 | Krt8          | -1.92 | 1.6   |
| 170 | Shmt1         | -1.45 | -1.58 |
| 171 | Nnt           | -1.29 | -1.17 |
| 172 | Gk            | -2.11 | -1.43 |
| 173 | Prodh         | -2.34 | -1.28 |
| 174 | Hykk          | -3.17 | -2.17 |
| 175 | Steap1        | -2.56 | 1.41  |
| 176 | Pth1r         | -3.52 | -1.17 |
| 177 | Lzts3         | -2.24 | -1.48 |
| 178 | Angpt1        | -1.86 | -1.24 |
| 179 | Pecr          | -2.58 | -1.69 |
| 180 | Fgf1          | -2.62 | -1.14 |
| 181 | Rab3il1       | 1.31  | -1.08 |
| 182 | Samd4         | 1.75  | 1.02  |
| 183 | Acsm3         | -2.19 | 3.3   |
| 184 | D630029K05Rik | -3.48 | -2.32 |
| 185 | Nqo1          | -1.67 | 1.52  |
| 186 | Bdh1          | -3.16 | -1.68 |
| 187 | Amacr         | -3.74 | -1.26 |
| 188 | Hibadh        | -2.00 | 1.01  |
| 189 | Sypl2         | -1.68 | -1.78 |
| 190 | Osbp110       | 1.59  | 1.02  |
| 191 | Grb7          | -3.48 | -1.27 |
| 192 | Eci3          | -3.34 | -1.9  |
| 193 | Snx29         | -2.09 | -1.78 |
| 194 | Prox1         | -2.04 | -1.11 |
| 195 | Suox          | -2.27 | -1.13 |
| 196 | Slc2a2        | -4.11 | -1.57 |
| 197 | G6pc          | -5.14 | -2.09 |
| 198 | Celsr2        | -2.55 | -1.18 |
| 199 | Slc7a12       | -3.64 | -6.43 |
| 200 | Fabp7         | -1.92 | -2.52 |
| 201 | BC038268      | -5.08 | -2.47 |
| 202 | Apoh          | -4.54 | 1.09  |
| 203 | Hao2          | -3.82 | -3.77 |
| 204 | BC089597      | -4.33 | -3.55 |
| 205 | Slc46a1       | -1.73 | -1.59 |
| 206 | Gabrb3        | -2.23 | -2.05 |
| 207 | Acot3         | -2.99 | -2.51 |
| 208 | Il1rn         | 2.80  | 1.31  |
| 209 | Suco          | 2.61  | 1.46  |
| 210 | St8sia1       | -2.39 | -2.26 |

|     |          |       |       |
|-----|----------|-------|-------|
| 211 | Tmem52b  | -2.89 | -2.11 |
| 212 | Ak4      | -3.72 | -1.85 |
| 213 | Cyp2j11  | -3.62 | -1.43 |
| 214 | Slc7a1   | 1.83  | 1.08  |
| 215 | Evc      | -2.47 | -1.43 |
| 216 | Pter     | -3.62 | -1.26 |
| 217 | Ddo      | -2.87 | -1.16 |
| 218 | Slc5a2   | -2.00 | -1.22 |
| 219 | Slc10a2  | -4.48 | -1.95 |
| 220 | Nipsnap1 | -2.91 | -1.37 |
| 221 | Hnf4a    | -3.50 | -1.28 |
| 222 | Slc16a7  | -1.23 | -2.05 |
| 223 | F2r11    | -2.48 | 1.54  |
| 224 | Slc16a4  | -1.85 | -2.16 |
| 225 | Slc6a13  | -4.34 | -1.8  |
| 226 | Slc37a4  | -2.37 | -1.68 |
| 227 | Dusp15   | -2.75 | -1.43 |
| 228 | Slc13a2  | -2.14 | -2.37 |
| 229 | Car4     | -2.80 | -1.52 |
| 230 | Fggy     | -4.22 | -1.95 |
| 231 | Ift122   | -1.18 | -1.45 |
| 232 | Acss1    | -1.78 | -2.04 |
| 233 | Tet1     | -1.76 | -1.37 |
| 234 | Susd2    | -3.47 | -1.36 |
| 235 | Paqr9    | -3.38 | -1.33 |
| 236 | Tmem64   | -1.77 | -1.14 |
| 237 | Dmtn     | -2.07 | -1.49 |
| 238 | Egf      | -3.47 | -3.55 |
| 239 | Slc9a3   | -3.14 | -1.11 |
| 240 | Gstz1    | -2.73 | -1.3  |
| 241 | Car12    | -2.59 | -1.95 |
| 242 | Dnajc12  | -2.81 | -1.66 |
| 243 | Rhcg     | -1.99 | -2.43 |
| 244 | Xylb     | -4.44 | -1.39 |
| 245 | Chst11   | -2.11 | 1.46  |
| 246 | Slc22a29 | -2.29 | -1.69 |
| 247 | Aldh4a1  | -3.18 | -1.74 |
| 248 | Adhfe1   | -2.49 | -1.05 |
| 249 | Rmdn2    | 1.87  | 1.08  |
| 250 | Dpep1    | -3.75 | -1.19 |
| 251 | Gys2     | -3.84 | -1.72 |
| 252 | Slc4a4   | -4.46 | -1.19 |
| 253 | B3galt5  | -1.91 | -1.96 |

|     |           |       |       |
|-----|-----------|-------|-------|
| 254 | Folh1     | -3.13 | -1.15 |
| 255 | Spp2      | -4.18 | -2.05 |
| 256 | Miox      | -3.20 | -1.05 |
| 257 | Abca13    | -4.17 | -2.33 |
| 258 | Gm11992   | -2.46 | -2.12 |
| 259 | Kcnip2    | 1.55  | -1.09 |
| 260 | D10Jhu81e | -2.02 | -1.31 |
| 261 | Pvalb     | -3.32 | -2.81 |
| 262 | Agtr1a    | -1.68 | -1.23 |
| 263 | Hsd3b2    | -2.13 | -2.39 |
| 264 | Bmp7      | -1.40 | -1.01 |
| 265 | Efhd1     | -2.05 | -1.2  |
| 266 | Veph1     | -2.26 | -1.38 |
| 267 | Angptl7   | -2.71 | 1.62  |
| 268 | Adm       | -1.75 | 1.63  |
| 269 | Slc5a12   | -3.78 | -2.28 |
| 270 | Cubn      | -4.14 | -1.63 |
| 271 | Stk32b    | -1.80 | -1.05 |
| 272 | Slc25a37  | -2.22 | 1.19  |
| 273 | Slc6a19   | -3.91 | -1.33 |
| 274 | Mme       | -3.52 | -1.61 |
| 275 | Rab31     | 1.84  | 1.2   |
| 276 | Adipoq    | 1.31  | 1.7   |
| 277 | Ppargc1a  | -4.00 | -1.16 |
| 278 | Clybl     | -1.72 | -1.09 |
| 279 | Esrrg     | -3.11 | -1.22 |
| 280 | Ptprd     | -3.08 | -1.33 |
| 281 | Hsd11b2   | -3.29 | -1.51 |
| 282 | Dcxr      | -1.87 | -1.5  |
| 283 | Qdpr      | -1.22 | -1.37 |
| 284 | Cck       | 1.85  | -1.25 |
| 285 | Tmem97    | 1.87  | -1.15 |
| 286 | Wfdc15b   | -2.66 | -1.76 |
| 287 | Slc7a9    | -3.67 | -1.27 |
| 288 | Aadac     | -4.52 | -1.21 |
| 289 | Tln2      | -3.21 | -1.49 |

---
