# Supplementary material for: Upregulation of FABP7 inhibits acute kidney injury-induced TCMK-1 cell apoptosis via activating the PPAR gamma signalling pathway
Source: Royal Society of Chemistry journal article supplement (doi:10.1039/d0mo00056f), 2020-08-12
Supplement: d0mo00056f2.pdf [file d0mo00056f2.pdf]

## SUPPLEMENTARY INFORMATION

Supplementary Table S2. GO analysis for the 289 overlapping genes based on DAVID database.

| ID | Category | Term                                               | Genes                                                                                                                                                                                                                                                                                                                              | PValue   |
|----|----------|----------------------------------------------------|------------------------------------------------------------------------------------------------------------------------------------------------------------------------------------------------------------------------------------------------------------------------------------------------------------------------------------|----------|
| 1  | BP       | GO:0055114~oxidation reduction                     | HSD3B2, CYP24A1, ME3, SORD, ADHFE1, CYP2C44, PAH, HIBADH, MTHFD1, ALDH1A1, PECR, CYP4A12A, FMO1, MIOX, CYP2J11, HAAO, BC089597, ALDH4A1, BDH2, DAO, NQO1, BDH1, SARDH, HPD, NOX4, GCDH, SUOX, AKR1E1, QDPR, CMAH, HGD, FADS2, AKR1C21, PPARGC1A, TET1, DDO, NNT, HAO2, CYP2D26, HSD11B2, DIO1, RDH16, CYP4A14, STEAP1, DCXR, PRODH | 1.18E-17 |
| 2  | BP       | GO:0055085~transmembrane transport                 | SLC12A6, SLC2A13, SLC5A2, SLC12A1, SLC5A1, SLC22A7, SLC22A8, RHBG, SLC7A9, AQP6, SLC26A4, SLC23A1, SLC16A7, SLC2A4, RHCg, SLC7A1, SLC25A10, SLC2A2, SLC16A9, SLC5A9, SLC13A2, SLC25A37, SLC13A3, SLC46A1, SLC5A12                                                                                                                  | 1.28E-07 |
| 3  | BP       | GO:0005996~monosaccharide metabolic process        | PDK2, SLC37A4, PDK4, CMAH, PGAM2, ADIPOQ, HIBADH, PCK1, GALM, G6PC, PPP1R1A, GYS2, MYC, DCXR, XYLb                                                                                                                                                                                                                                 | 1.25E-06 |
| 4  | BP       | GO:0006814~sodium ion transport                    | SLC12A6, SLC5A2, SLC23A1, SLC12A1, SLC5A1, SLC9A3, SLC5A9, SLC13A2, SLC13A3, SLC10A2, SLC4A4, SLC5A12                                                                                                                                                                                                                              | 3.05E-06 |
| 5  | BP       | GO:0015758~glucose transport                       | SLC5A2, G6PC, SLC2A4, SLC2A2, SLC5A1, SLC37A4, STXBP4                                                                                                                                                                                                                                                                              | 3.22E-06 |
| 6  | BP       | GO:0008645~hexose transport                        | SLC5A2, G6PC, SLC2A4, SLC2A2, SLC5A1, SLC37A4, STXBP4                                                                                                                                                                                                                                                                              | 4.95E-06 |
| 7  | BP       | GO:0015749~monosaccharide transport                | SLC5A2, G6PC, SLC2A4, SLC2A2, SLC5A1, SLC37A4, STXBP4                                                                                                                                                                                                                                                                              | 6.06E-06 |
| 8  | BP       | GO:0006006~glucose metabolic process               | PDK2, G6PC, PPP1R1A, PDK4, SLC37A4, GYS2, PGAM2, ADIPOQ, MYC, DCXR, HIBADH, PCK1                                                                                                                                                                                                                                                   | 9.16E-06 |
| 9  | BP       | GO:0006811~ion transport                           | SLC5A2, GABRB3, SLC9A3, SLC5A1, RHBG, KCNIP2, KCNJ1, SLC23A1, WNK4, CHRNA4, SLC4A1, SLC4A4, SLC12A6, SLC12A1, PTGER3, SLC22A7, SLC22A8, SLC10A2, SLC26A4, NNT, SLC16A7, RHCg, SLC5A9, SLC25A37, SLC13A2, SLC13A3, STEAP1, SLC5A12                                                                                                  | 1.00E-05 |
| 10 | BP       | GO:0019318~hexose metabolic process                | PDK2, SLC37A4, PDK4, PGAM2, ADIPOQ, HIBADH, PCK1, G6PC, GALM, PPP1R1A, GYS2, MYC, DCXR                                                                                                                                                                                                                                             | 1.01E-05 |
| 11 | BP       | GO:0016054~organic acid catabolic process          | MTHFD1, HGD, GSTZ1, BDH2, PAH, ADIPOQ, SARDH, HPD, PRODH                                                                                                                                                                                                                                                                           | 3.04E-05 |
| 12 | BP       | GO:0046395~carboxylic acid catabolic process       | MTHFD1, HGD, GSTZ1, BDH2, PAH, ADIPOQ, SARDH, HPD, PRODH                                                                                                                                                                                                                                                                           | 3.04E-05 |
| 13 | BP       | GO:0008643~carbohydrate transport                  | SLC2A13, SLC5A2, G6PC, SLC2A4, SLC2A2, SLC5A1, SLC37A4, STXBP4                                                                                                                                                                                                                                                                     | 3.25E-05 |
| 14 | BP       | GO:0006732~coenzyme metabolic process              | MTHFD1, FOLH1, ACSS1, HNF4A, PDK4, HAAO, ACSS2, SCP2, DCXR, HIBADH, ACOT3                                                                                                                                                                                                                                                          | 6.39E-05 |
| 15 | BP       | GO:0006559~L-phenylalanine catabolic process       | HGD, GSTZ1, PAH, HPD                                                                                                                                                                                                                                                                                                               | 6.64E-05 |
| 16 | BP       | GO:0046942~carboxylic acid transport               | SLC23A1, SLC7A1, SLC7A9, SLC13A3, SLC10A2, SLC6A19, SLC1A1, SLC46A1, SLC7A12                                                                                                                                                                                                                                                       | 1.28E-04 |
| 17 | BP       | GO:0015849~organic acid transport                  | SLC23A1, SLC7A1, SLC7A9, SLC13A3, SLC10A2, SLC6A19, SLC1A1, SLC46A1, SLC7A12                                                                                                                                                                                                                                                       | 1.37E-04 |
| 18 | BP       | GO:0009063~cellular amino acid catabolic process   | MTHFD1, HGD, GSTZ1, PAH, SARDH, HPD, PRODH                                                                                                                                                                                                                                                                                         | 1.59E-04 |
| 19 | BP       | GO:0006820~anion transport                         | SLC26A4, SLC12A6, SLC12A1, PTGER3, SLC16A7, WNK4, SLC22A7, SLC4A1, SLC10A2, SLC4A4                                                                                                                                                                                                                                                 | 1.61E-04 |
| 20 | BP       | GO:0006558~L-phenylalanine metabolic process       | HGD, GSTZ1, PAH, HPD                                                                                                                                                                                                                                                                                                               | 1.82E-04 |
| 21 | BP       | GO:0015672~monovalent inorganic cation transport   | SLC12A6, SLC5A2, SLC12A1, SLC9A3, SLC5A1, SLC10A2, KCNIP2, KCNJ1, SLC23A1, NNT, SLC13A2, SLC5A9, SLC13A3, SLC4A4, SLC5A12                                                                                                                                                                                                          | 2.17E-04 |
| 22 | BP       | GO:0055067~monovalent inorganic cation homeostasis | SLC26A4, BSND, RHCg, AQP11, SLC9A3, SLC4A4                                                                                                                                                                                                                                                                                         | 2.55E-04 |
| 23 | BP       | GO:0016053~organic acid biosynthetic process       | ACSM3, MTHFD1, PECR, ACSM1, BHMT2, AMACR, FADS2, ALDH4A1, PAH, PRODH                                                                                                                                                                                                                                                               | 2.96E-04 |
| 24 | BP       | GO:0046394~carboxylic acid biosynthetic process    | ACSM3, MTHFD1, PECR, ACSM1, BHMT2, AMACR, FADS2, ALDH4A1, PAH, PRODH                                                                                                                                                                                                                                                               | 2.96E-04 |
| 25 | BP       | GO:0006812~cation transport                        | SLC12A6, SLC5A2, SLC12A1, SLC5A1, SLC9A3, RHBG, SLC10A2, KCNIP2, KCNJ1, SLC23A1, NNT, RHCg, SLC5A9, SLC25A37, SLC13A2, CHRNA4, SLC13A3, SLC4A4, STEAP1, SLC5A12                                                                                                                                                                    | 3.18E-04 |

|    |    |                                                                |                                                                                                                                                |                |
|----|----|----------------------------------------------------------------|------------------------------------------------------------------------------------------------------------------------------------------------|----------------|
| 26 | BP | GO:0006570~tyrosine metabolic process                          | HGD, GSTZ1, PAH, HPD                                                                                                                           | 3.81E-04       |
| 27 | BP | GO:0009310~amine catabolic process                             | MTHFD1, HGD, GSTZ1, PAH, SARDH, HPD, PRODH                                                                                                     | 4.43E-04       |
| 28 | BP | GO:0051186~cofactor metabolic process                          | MTHFD1, FOLH1, ACSS1, HNF4A, PDK4, HAAO, ACSS2, SCP2, DCXR, HIBADH, ACOT3                                                                      | 4.58E-04       |
| 29 | BP | GO:0009074~aromatic amino acid family catabolic process        | HGD, GSTZ1, PAH, HPD                                                                                                                           | 5.18E-04       |
| 30 | BP | GO:0030001~metal ion transport                                 | SLC12A6, SLC5A2, SLC12A1, SLC5A1, SLC9A3, SLC10A2, KCNIP2, KCNJ1, SLC23A1, SLC25A37, SLC13A2, CHRNA4, SLC5A9, SLC13A3, SLC4A4, STEAP1, SLC5A12 | 0.0011507<br>4 |
| 31 | BP | GO:0006885~regulation of pH                                    | SLC26A4, RHCG, AQP11, SLC9A3, SLC4A4                                                                                                           | 0.0011712<br>3 |
| 32 | BP | GO:0048878~chemical homeostasis                                | PTGER3, SLC9A3, SLC37A4, PTH1R, SYPL2, ADIPOQ, SLC26A4, BSND, G6PC, SLC2A4, RHCG, AQP11, WNK4, CHRNA4, SLC4A4                                  | 0.0013641<br>2 |
| 33 | BP | GO:0019439~aromatic compound catabolic process                 | HGD, GSTZ1, PAH, HPD                                                                                                                           | 0.0013657<br>9 |
| 34 | BP | GO:0015698~inorganic anion transport                           | SLC26A4, SLC12A6, SLC12A1, PTGER3, WNK4, SLC4A1, SLC4A4                                                                                        | 0.0016162<br>8 |
| 35 | BP | GO:0006631~fatty acid metabolic process                        | ACSM3, PECR, ACSM1, CYP4A12A, HAO2, FADS2, BDH2, ADIPOQ, ACSM5, ACOT3                                                                          | 0.0019793<br>2 |
| 36 | BP | GO:0055080~cation homeostasis                                  | SLC26A4, BSND, PTGER3, RHCG, AQP11, SLC9A3, SLC37A4, PTH1R, SLC4A4, SYPL2                                                                      | 0.0019793<br>2 |
| 37 | BP | GO:0006572~tyrosine catabolic process                          | HGD, GSTZ1, HPD                                                                                                                                | 0.0022194<br>7 |
| 38 | BP | GO:0006112~energy reserve metabolic process                    | G6PC, KL, PPP1R1A, SLC37A4, GYS2                                                                                                               | 0.0022903<br>3 |
| 39 | BP | GO:0015711~organic anion transport                             | PTGER3, SLC16A7, SLC22A7, SLC10A2, SLC4A4                                                                                                      | 0.0027859      |
| 40 | BP | GO:0008202~steroid metabolic process                           | HSD3B2, CYP24A1, G6PC, CUBN, AMACR, SLC37A4, HSD11B2, OSBPL10, AKR1C21                                                                         | 0.0031647      |
| 41 | BP | GO:0006085~acetyl-CoA biosynthetic process                     | ACSS1, PDK4, ACSS2                                                                                                                             | 0.003296       |
| 42 | BP | GO:0009072~aromatic amino acid family metabolic process        | HGD, GSTZ1, PAH, HPD                                                                                                                           | 0.0037338<br>8 |
| 43 | BP | GO:0015980~energy derivation by oxidation of organic compounds | G6PC, KL, PPP1R1A, SLC37A4, GYS2, PPARGC1A, PCK1                                                                                               | 0.0037395<br>5 |
| 44 | BP | GO:0009749~response to glucose stimulus                        | HNF4A, SLC37A4, GYS2, ADIPOQ                                                                                                                   | 0.0042756<br>1 |
| 45 | BP | GO:0009746~response to hexose stimulus                         | HNF4A, SLC37A4, GYS2, ADIPOQ                                                                                                                   | 0.0042756<br>1 |
| 46 | BP | GO:0034284~response to monosaccharide stimulus                 | HNF4A, SLC37A4, GYS2, ADIPOQ                                                                                                                   | 0.0042756<br>1 |
| 47 | BP | GO:0008652~cellular amino acid biosynthetic process            | MTHFD1, BHMT2, ALDH4A1, PAH, PRODH                                                                                                             | 0.0043354<br>3 |
| 48 | BP | GO:0050801~ion homeostasis                                     | SLC26A4, BSND, PTGER3, RHCG, AQP11, WNK4, SLC9A3, SLC37A4, PTH1R, CHRNA4, SLC4A4, SYPL2                                                        | 0.0051477      |
| 49 | BP | GO:0006090~pyruvate metabolic process                          | G6PC, ME3, PDK4, PCK1                                                                                                                          | 0.0061763<br>7 |
| 50 | BP | GO:0006091~generation of precursor metabolites and energy      | G6PC, KL, PPP1R1A, SLC37A4, CMAH, GYS2, FADS2, PGAM2, STEAP1, PPARGC1A, PCK1                                                                   | 0.0065299<br>4 |
| 51 | BP | GO:0009743~response to carbohydrate stimulus                   | HNF4A, SLC37A4, GYS2, ADIPOQ                                                                                                                   | 0.0069049<br>7 |
| 52 | BP | GO:0048596~embryonic camera-type eye morphogenesis             | ALDH1A1, BMP7, PROX1                                                                                                                           | 0.0095005<br>6 |
| 53 | BP | GO:0008610~lipid biosynthetic process                          | ACSM3, ALDH1A1, HSD3B2, PECR, ACSM1, AMACR, ST8SIA1, FADS2, AKR1C21, RDH16, PCK1                                                               | 0.0117183<br>3 |
| 54 | BP | GO:0015837~amine transport                                     | SLC7A1, SLC6A4, SLC7A9, SLC6A19, SLC46A1, SLC7A12                                                                                              | 0.0129460<br>2 |
| 55 | BP | GO:0006073~cellular glucan metabolic process                   | G6PC, PPP1R1A, SLC37A4, GYS2                                                                                                                   | 0.0134105<br>9 |
| 56 | BP | GO:0044042~glucan metabolic process                            | G6PC, PPP1R1A, SLC37A4, GYS2                                                                                                                   | 0.0134105<br>9 |
| 57 | BP | GO:0005977~glycogen metabolic process                          | G6PC, PPP1R1A, SLC37A4, GYS2                                                                                                                   | 0.0134105<br>9 |
| 58 | BP | GO:0009108~coenzyme biosynthetic process                       | MTHFD1, ACSS1, PDK4, HAAO, ACSS2                                                                                                               | 0.0160634<br>3 |
| 59 | BP | GO:0048048~embryonic eye morphogenesis                         | ALDH1A1, BMP7, PROX1                                                                                                                           | 0.0184631      |
| 60 | BP | GO:0006766~vitamin metabolic process                           | ALDH1A1, CYP24A1, HAAO, LRP2, RDH16                                                                                                            | 0.0206240<br>1 |
| 61 | BP | GO:0031076~embryonic camera-type eye development               | ALDH1A1, BMP7, PROX1                                                                                                                           | 0.0210934<br>5 |

|    |    |                                                          |                                                                                                                                                                                                                                                                                                                |                |
|----|----|----------------------------------------------------------|----------------------------------------------------------------------------------------------------------------------------------------------------------------------------------------------------------------------------------------------------------------------------------------------------------------|----------------|
| 62 | BP | GO:0033500~carbohydrate homeostasis                      | G6PC, SLC2A4, SLC37A4, ADIPOQ                                                                                                                                                                                                                                                                                  | 0.0224853      |
| 63 | BP | GO:0042593~glucose homeostasis                           | G6PC, SLC2A4, SLC37A4, ADIPOQ                                                                                                                                                                                                                                                                                  | 0.0224853      |
| 64 | BP | GO:0006865~amino acid transport                          | SLC7A1, SLC7A9, SLC6A19, SLC46A1, SLC7A12                                                                                                                                                                                                                                                                      | 0.0226490<br>7 |
| 65 | BP | GO:0001822~kidney development                            | AGTR1A, LHX1, AQP11, SLC5A1, WWTR1, BMP7                                                                                                                                                                                                                                                                       | 0.0233741<br>7 |
| 66 | BP | GO:0001655~urogenital system development                 | SFRP1, AGTR1A, LHX1, AQP11, SLC5A1, WWTR1, BMP7                                                                                                                                                                                                                                                                | 0.0238219<br>1 |
| 67 | BP | GO:0046849~bone remodeling                               | NOX4, PTH1R, SPP2                                                                                                                                                                                                                                                                                              | 0.0238693<br>3 |
| 68 | BP | GO:0009309~amine biosynthetic process                    | MTHFD1, BHMT2, ALDH4A1, PAH, PRODH                                                                                                                                                                                                                                                                             | 0.0247912<br>7 |
| 69 | BP | GO:0014070~response to organic cyclic substance          | SLC22A8, SLC37A4, ABAT, CHRNA4                                                                                                                                                                                                                                                                                 | 0.0255602<br>9 |
| 70 | BP | GO:0051180~vitamin transport                             | SLC23A1, SLC2A2, SLC46A1                                                                                                                                                                                                                                                                                       | 0.0267857<br>7 |
| 71 | BP | GO:0044264~cellular polysaccharide metabolic process     | G6PC, PPP1R1A, SLC37A4, GYS2                                                                                                                                                                                                                                                                                   | 0.0271782<br>2 |
| 72 | BP | GO:0008284~positive regulation of cell proliferation     | ADM, LHX1, FGF9, PTH1R, ST8SIA1, ID4, EGF, FGF1, PROX1, MYC                                                                                                                                                                                                                                                    | 0.0292871<br>4 |
| 73 | BP | GO:0048568~embryonic organ development                   | ALDH1A1, ADM, FGF9, CHST11, KRT8, BMP7, PROX1, MYC, CYR61                                                                                                                                                                                                                                                      | 0.0308343      |
| 74 | BP | GO:0042592~homeostatic process                           | NOX4, PTGER3, SLC9A3, SLC37A4, PTH1R, SYPL2, ADIPOQ, SLC26A4, BSND, G6PC, SLC2A4, RHCG, AQP11, WNK4, CHRNA4, SLC4A4                                                                                                                                                                                            | 0.0325045<br>9 |
| 75 | BP | GO:0060348~bone development                              | FGF9, PTH1R, WWTR1, BMP7, PAPSS2, IGFBP5                                                                                                                                                                                                                                                                       | 0.0337348<br>2 |
| 76 | BP | GO:0001649~osteoblast differentiation                    | FGF9, PTH1R, WWTR1, IGFBP5                                                                                                                                                                                                                                                                                     | 0.0341832<br>4 |
| 77 | BP | GO:0048771~tissue remodeling                             | NOX4, PTH1R, SEMA3C, SPP2                                                                                                                                                                                                                                                                                      | 0.0341832<br>4 |
| 78 | BP | GO:0006637~acyl-CoA metabolic process                    | HNF4A, SCP2, ACOT3                                                                                                                                                                                                                                                                                             | 0.0363303<br>9 |
| 79 | BP | GO:0016051~carbohydrate biosynthetic process             | B3GAT2, G6PC, CHST11, GYS2, PCK1                                                                                                                                                                                                                                                                               | 0.0372975<br>8 |
| 80 | BP | GO:0002062~chondrocyte differentiation                   | FGF9, CHST11, PTH1R                                                                                                                                                                                                                                                                                            | 0.0397616      |
| 81 | BP | GO:0006898~receptor-mediated endocytosis                 | CUBN, SLC9A3, LRP2                                                                                                                                                                                                                                                                                             | 0.0397616      |
| 82 | BP | GO:0009066~aspartate family amino acid metabolic process | MTHFD1, BHMT2, DDO                                                                                                                                                                                                                                                                                             | 0.0433102      |
| 83 | BP | GO:0042732~D-xylose metabolic process                    | DCXR, XYLB                                                                                                                                                                                                                                                                                                     | 0.0447985<br>2 |
| 84 | BP | GO:0015696~ammonium transport                            | RHCG, RHBG                                                                                                                                                                                                                                                                                                     | 0.0447985<br>2 |
| 85 | BP | GO:0015712~hexose phosphate transport                    | G6PC, SLC37A4                                                                                                                                                                                                                                                                                                  | 0.0447985<br>2 |
| 86 | BP | GO:0015760~glucose-6-phosphate transport                 | G6PC, SLC37A4                                                                                                                                                                                                                                                                                                  | 0.0447985<br>2 |
| 87 | BP | GO:0010817~regulation of hormone levels                  | ALDH1A1, IL1RN, HSD11B2, DIO1, RDH16, DDO                                                                                                                                                                                                                                                                      | 0.0452952<br>7 |
| 88 | BP | GO:0006873~cellular ion homeostasis                      | BSND, PTGER3, RHCG, AQP11, WNK4, SLC37A4, PTH1R, CHRNA4, SYPL2                                                                                                                                                                                                                                                 | 0.0455698<br>6 |
| 89 | BP | GO:0050878~regulation of body fluid levels               | PTGER3, F2RL1, APOH, HSD11B2, PAPSS2                                                                                                                                                                                                                                                                           | 0.0462594      |
| 90 | BP | GO:0042445~hormone metabolic process                     | ALDH1A1, HSD11B2, DIO1, RDH16, DDO                                                                                                                                                                                                                                                                             | 0.0478597<br>5 |
| 91 | BP | GO:0051188~cofactor biosynthetic process                 | MTHFD1, ACSS1, PDK4, HAAO, ACSS2                                                                                                                                                                                                                                                                               | 0.0494905<br>1 |
| 92 | CC | GO:0005903~brush border                                  | SLC5A2, CUBN, SLC2A2, SLC5A1, SLC9A3, PTH1R, LRP2, PDZK1, DCXR                                                                                                                                                                                                                                                 | 5.38E-08       |
| 93 | CC | GO:0031980~mitochondrial lumen                           | GCDH, PDK2, ME3, PDK4, ACSM3, MCCC2, ACSM1, ACSS1, ALDH4A1, ABAT, BDH1, SARDH, ACSM5, PRODH                                                                                                                                                                                                                    | 1.77E-06       |
| 94 | CC | GO:0005759~mitochondrial matrix                          | GCDH, PDK2, ME3, PDK4, ACSM3, MCCC2, ACSM1, ACSS1, ALDH4A1, ABAT, BDH1, SARDH, ACSM5, PRODH                                                                                                                                                                                                                    | 1.77E-06       |
| 95 | CC | GO:0016324~apical plasma membrane                        | SLC26A4, SLC12A6, SLC12A1, CUBN, SLC6A20B, RHCG, SLC5A1, SLC9A3, LRP2, SLC10A2, SLC46A1, HSD3B2, CYP24A1, ME3, ADHFE1, HINT2, BPHL, CLYBL, HIBADH, KEG1, MTHFD1, MCCC2, PECR, EFHD1, ACSS1, PXMP2, GSTZ1, ALDH4A1, BDH1, SARDH, AADAT, GCDH, SUOX, SHMT1, PDK2, GATM, PDK4, AMACR, QDPR, GLYCTK, ACSM3, ACSM1, | 3.46E-06       |
| 96 | CC | GO:0005739~mitochondrion                                 |                                                                                                                                                                                                                                                                                                                | 3.57E-05       |

|         |    |                                             |                                                                                                                                                                                                                                                                                                                                                                                                                                                                                                                           |                |
|---------|----|---------------------------------------------|---------------------------------------------------------------------------------------------------------------------------------------------------------------------------------------------------------------------------------------------------------------------------------------------------------------------------------------------------------------------------------------------------------------------------------------------------------------------------------------------------------------------------|----------------|
|         |    |                                             | NNT, SLC25A10, NIPSNAP1, HAO2, SLC25A37, ABAT, SCP2, ACSM5, PRODH, D10JHU81E                                                                                                                                                                                                                                                                                                                                                                                                                                              |                |
| 97      | CC | GO:0045177~apical part of cell              | SLC26A4, SLC12A6, SLC12A1, CUBN, SLC6A20B, RHCG, SLC5A1, SLC9A3, LRP2, SLC10A2, SLC46A1                                                                                                                                                                                                                                                                                                                                                                                                                                   | 5.70E-05       |
| 98      | CC | GO:0044429~mitochondrial part               | GCDH, PDK2, SUOX, ME3, GATM, PDK4, ACSM3, MCCC2, EFHD1, ACSS1, ACSM1, NNT, SLC25A10, NIPSNAP1, ABAT, ALDH4A1, SLC25A37, SARDH, BDH1, ACSM5, PRODH                                                                                                                                                                                                                                                                                                                                                                         | 2.29E-04       |
| 99      | CC | GO:0005886~plasma membrane                  | CCKAR, SLC5A2, GABRB3, SLC6A20B, SLC15A2, TLN2, SLC5A1, SLC9A3, SLC6A4, F2RL1, AQP6, KCNIP2, VEPH1, SLC23A1, SLC2A4, AQP11, SLC2A2, WNK4, CHRNA4, SLC4A1, SLC4A4, CEACAM2, DPEP1, SLC12A6, RAP2B, PTGER3, SLC22A7, TIMD2, SLC22A8, ARHGAP24, SLC7A12, SLC26A4, BSND, FOLH1, RHCG, AGTR1A, RAB17, CAR4, FRAS1, PTH1R, IL4RA, RHBG, MME, KRT8, CLEC2H, EGF, EHD3, CSF1R, NOX4, CUBN, SLC12A1, KL, SLC6A13, ITGA1, CELSR2, SLC10A2, SLC6A19, SAMD4, RAB31, SLC16A7, PKP2, SLC16A9, LRP8, LRP2, PDZK1, SLC46A1, DCXR, SLC5A12 | 3.53E-04       |
| 10<br>0 | CC | GO:0000267~cell fraction                    | ACY1, SORD, SLC15A2, SLC37A4, FADS2, SAMD4, AADAC, G6PC, CYP4A12A, SLC16A7, SLC2A4, FMO1, HSD11B2, MEP1B, CYP2D26, GYS2, CHRNA4, SLC13A3, DIO1, LRP2, CYP4A14, RDH16                                                                                                                                                                                                                                                                                                                                                      | 4.65E-04       |
| 10<br>1 | CC | GO:0005792~microsome                        | AADAC, G6PC, CYP4A12A, SLC2A4, FMO1, SLC37A4, HSD11B2, CYP2D26, DIO1, CYP4A14, RDH16                                                                                                                                                                                                                                                                                                                                                                                                                                      | 4.71E-04       |
| 10<br>2 | CC | GO:0042598~vesicular fraction               | AADAC, G6PC, CYP4A12A, SLC2A4, FMO1, SLC37A4, HSD11B2, CYP2D26, DIO1, CYP4A14, RDH16                                                                                                                                                                                                                                                                                                                                                                                                                                      | 6.14E-04       |
| 10<br>3 | CC | GO:0005626~insoluble fraction               | SLC15A2, SLC37A4, FADS2, SAMD4, AADAC, G6PC, CYP4A12A, SLC16A7, SLC2A4, FMO1, HSD11B2, MEP1B, CYP2D26, GYS2, CHRNA4, SLC13A3, DIO1, LRP2, CYP4A14, RDH16                                                                                                                                                                                                                                                                                                                                                                  | 6.78E-04       |
| 10<br>4 | CC | GO:0044459~plasma membrane part             | FRAS1, SLC5A2, GABRB3, SLC6A20B, SLC15A2, TLN2, SLC9A3, SLC5A1, SLC6A4, PTH1R, RHBG, AQP6, VEPH1, SLC23A1, SLC2A4, WNK4, CHRNA4, SLC4A1, CLEC2H, SLC4A4, EHD3, SLC12A6, NOX4, RAP2B, CUBN, SLC12A1, SLC22A7, SLC6A13, ITGA1, ARHGAP24, SLC10A2, SAMD4, SLC6A19, SLC26A4, BSND, FOLH1, RAB31, RHCG, PKP2, RAB17, LRP2, PDZK1, SLC46A1                                                                                                                                                                                      | 8.00E-04       |
| 10<br>5 | CC | GO:0005624~membrane fraction                | SLC15A2, SLC37A4, FADS2, SAMD4, AADAC, G6PC, CYP4A12A, SLC16A7, SLC2A4, FMO1, HSD11B2, MEP1B, CYP2D26, CHRNA4, SLC13A3, DIO1, LRP2, CYP4A14, RDH16                                                                                                                                                                                                                                                                                                                                                                        | 0.0011707<br>6 |
| 10<br>6 | CC | GO:0031526~brush border membrane            | SLC5A2, SLC9A3, PTH1R, PDZK1                                                                                                                                                                                                                                                                                                                                                                                                                                                                                              | 0.0012333<br>7 |
| 10<br>7 | CC | GO:0042579~microbody                        | PECR, AMACR, HAO2, PXMP2, DAO, DDO, SCP2, ACOT3                                                                                                                                                                                                                                                                                                                                                                                                                                                                           | 0.0012685<br>3 |
| 10<br>8 | CC | GO:0005777~peroxisome                       | PECR, AMACR, HAO2, PXMP2, DAO, DDO, SCP2, ACOT3                                                                                                                                                                                                                                                                                                                                                                                                                                                                           | 0.0012685<br>3 |
| 10<br>9 | CC | GO:0016323~basolateral plasma membrane      | SLC12A6, NOX4, BSND, SLC23A1, TLN2, PTH1R, RHBG, SLC4A1, ARHGAP24                                                                                                                                                                                                                                                                                                                                                                                                                                                         | 0.0017480<br>3 |
| 11<br>0 | CC | GO:0042995~cell projection                  | SLC12A6, SLC5A2, CCK, CUBN, GABRB3, TLN2, SLC5A1, SLC9A3, PTH1R, ARHGAP24, SAMD4, IFT122, PVALB, SLC2A2, FABP7, LRP2, PDZK1, MYC, DCXR, DPEP1                                                                                                                                                                                                                                                                                                                                                                             | 0.0018403<br>5 |
| 11<br>1 | CC | GO:0005887~integral to plasma membrane      | SLC6A20B, SLC15A2, SLC22A7, SLC6A4, SLC6A13, ITGA1, RHBG, AQP6, SLC6A19, BSND, FOLH1, SLC2A4, RHCG, CHRNA4, SLC4A4, CLEC2H                                                                                                                                                                                                                                                                                                                                                                                                | 0.0208270<br>4 |
| 11<br>2 | CC | GO:0031226~intrinsic to plasma membrane     | SLC6A20B, SLC15A2, SLC22A7, SLC6A4, SLC6A13, ITGA1, RHBG, AQP6, SLC6A19, BSND, FOLH1, SLC2A4, RHCG, CHRNA4, SLC4A4, CLEC2H                                                                                                                                                                                                                                                                                                                                                                                                | 0.0282017<br>8 |
| 11<br>3 | CC | GO:0031253~cell projection membrane         | SLC5A2, SLC9A3, PTH1R, PDZK1                                                                                                                                                                                                                                                                                                                                                                                                                                                                                              | 0.0299695<br>7 |
| 11<br>4 | CC | GO:0005743~mitochondrial inner membrane     | GCDH, EFHD1, NNT, GATM, SLC25A10, NIPSNAP1, PDK4, SLC25A37, BDH1, PRODH                                                                                                                                                                                                                                                                                                                                                                                                                                                   | 0.0448420<br>8 |
| 11<br>5 | MF | GO:0015293~symporter activity               | SLC12A6, SLC5A2, SLC2A13, SLC12A1, SLC6A20B, SLC15A2, SLC5A1, SLC6A4, SLC6A13, SLC10A2, SLC6A19, SLC23A1, SLC16A7, SLC2A4, SLC16A9, SLC13A2, SLC13A3, SLC4A4, SLC1A1, SLC5A12                                                                                                                                                                                                                                                                                                                                             | 3.19E-13       |
| 11<br>6 | MF | GO:0015294~solute:cation symporter activity | SLC12A6, SLC2A13, SLC5A2, SLC12A1, SLC6A20B, SLC2A4, SLC5A1, SLC6A4, SLC6A13, SLC13A3, SLC4A4, SLC10A2, SLC1A1, SLC6A19                                                                                                                                                                                                                                                                                                                                                                                                   | 1.25E-10       |
| 11<br>7 | MF | GO:0015370~solute:sodium symporter activity | SLC5A2, SLC6A20B, SLC5A1, SLC6A13, SLC6A4, SLC13A3, SLC10A2, SLC6A19, SLC1A1                                                                                                                                                                                                                                                                                                                                                                                                                                              | 6.12E-07       |

|         |    |                                                                                                    |                                                                                                                                                                                                                                                                                                                                                                                                                                                                                                                                                                                    |                |
|---------|----|----------------------------------------------------------------------------------------------------|------------------------------------------------------------------------------------------------------------------------------------------------------------------------------------------------------------------------------------------------------------------------------------------------------------------------------------------------------------------------------------------------------------------------------------------------------------------------------------------------------------------------------------------------------------------------------------|----------------|
| 11<br>8 | MF | GO:0048037~cofactor binding                                                                        | AADAT, NOX4, GCDH, SUOX, SHMT1, ME3, PAH, HIBADH, HNF4A, FMO1, HAO2, HSD11B2, ABAT, BDH2, NQO1, STEAP1                                                                                                                                                                                                                                                                                                                                                                                                                                                                             | 3.80E-06       |
| 11<br>9 | MF | GO:0009055~electron carrier activity                                                               | NOX4, GCDH, SUOX, CYP24A1, CYP2C44, CMAH, CYP4A12A, NNT, HAO2, CYP2J11, CYP2D26, NQO1, CYP4A14, STEAP1                                                                                                                                                                                                                                                                                                                                                                                                                                                                             | 2.37E-05       |
| 12<br>0 | MF | GO:0051119~sugar transmembrane transporter activity                                                | SLC2A13, SLC5A2, SLC2A4, SLC2A2, SLC5A1, SLC37A4                                                                                                                                                                                                                                                                                                                                                                                                                                                                                                                                   | 3.42E-05       |
| 12<br>1 | MF | GO:0005506~iron ion binding                                                                        | NOX4, SUOX, CYP24A1, CYP2C44, CMAH, FADS2, HGD, PAH, TET1, CYP4A12A, MIOX, CYP2J11, HAAO, CYP2D26, SLC25A37, CYP4A14, STEAP1, HPD                                                                                                                                                                                                                                                                                                                                                                                                                                                  | 4.05E-05       |
| 12<br>2 | MF | GO:0031402~sodium ion binding                                                                      | SLC5A2, SLC23A1, SLC12A1, SLC5A1, SLC5A9, SLC13A2, SLC13A3, SLC10A2, SLC4A4, SLC5A12                                                                                                                                                                                                                                                                                                                                                                                                                                                                                               | 4.17E-05       |
| 12<br>3 | MF | GO:0050662~coenzyme binding                                                                        | NOX4, GCDH, SUOX, ME3, HNF4A, FMO1, HAO2, HSD11B2, BDH2, NQO1, STEAP1, HIBADH                                                                                                                                                                                                                                                                                                                                                                                                                                                                                                      | 5.57E-05       |
| 12<br>4 | MF | GO:0015149~hexose transmembrane transporter activity                                               | SLC5A2, SLC2A4, SLC2A2, SLC5A1, SLC37A4                                                                                                                                                                                                                                                                                                                                                                                                                                                                                                                                            | 5.77E-05       |
| 12<br>5 | MF | GO:0015145~monosaccharide transmembrane transporter activity                                       | SLC5A2, SLC2A4, SLC2A2, SLC5A1, SLC37A4                                                                                                                                                                                                                                                                                                                                                                                                                                                                                                                                            | 7.77E-05       |
| 12<br>6 | MF | GO:0031420~alkali metal ion binding                                                                | SLC12A6, SLC5A2, SLC23A1, SLC12A1, SLC5A1, SLC5A9, SLC13A2, SLC13A3, KCNIP2, SLC10A2, SLC4A4, SLC5A12, KCNJ1                                                                                                                                                                                                                                                                                                                                                                                                                                                                       | 1.27E-04       |
| 12<br>7 | MF | GO:0016878~acid-thiol ligase activity                                                              | ACSM3, ACSM1, ACSS1, ACSS2, ACSM5                                                                                                                                                                                                                                                                                                                                                                                                                                                                                                                                                  | 1.32E-04       |
| 12<br>8 | MF | GO:0015296~anion:cation symporter activity                                                         | SLC12A6, SLC12A1, SLC13A3, SLC4A4, SLC1A1                                                                                                                                                                                                                                                                                                                                                                                                                                                                                                                                          | 1.68E-04       |
| 12<br>9 | MF | GO:0008509~anion transmembrane transporter activity                                                | SLC26A4, SLC12A6, BSND, SLC12A1, GABRB3, SLC22A7, SLC13A3, SLC4A1, SLC4A4, SLC1A1                                                                                                                                                                                                                                                                                                                                                                                                                                                                                                  | 2.52E-04       |
| 13<br>0 | MF | GO:0005355~glucose transmembrane transporter activity                                              | SLC5A2, SLC2A4, SLC2A2, SLC5A1                                                                                                                                                                                                                                                                                                                                                                                                                                                                                                                                                     | 3.22E-04       |
| 13<br>1 | MF | GO:0005275~amine transmembrane transporter activity                                                | SLC7A1, SLC6A13, SLC6A4, SLC7A9, SLC6A19, SLC1A1, SLC7A12                                                                                                                                                                                                                                                                                                                                                                                                                                                                                                                          | 5.14E-04       |
| 13<br>2 | MF | GO:0016645~oxidoreductase activity, acting on the CH-NH group of donors                            | MTHFD1, QDPR, ALDH4A1, SARDH, PRODH                                                                                                                                                                                                                                                                                                                                                                                                                                                                                                                                                | 6.34E-04       |
| 13<br>3 | MF | GO:0016877~ligase activity, forming carbon-sulfur bonds                                            | ACSM3, ACSM1, ACSS1, ACSS2, ACSM5                                                                                                                                                                                                                                                                                                                                                                                                                                                                                                                                                  | 9.89E-04       |
| 13<br>4 | MF | GO:0015171~amino acid transmembrane transporter activity                                           | SLC7A1, SLC6A13, SLC7A9, SLC6A19, SLC1A1, SLC7A12                                                                                                                                                                                                                                                                                                                                                                                                                                                                                                                                  | 0.0012153<br>2 |
| 13<br>5 | MF | GO:0047760~butyrate-CoA ligase activity                                                            | ACSM3, ACSM1, ACSM5                                                                                                                                                                                                                                                                                                                                                                                                                                                                                                                                                                | 0.0025002<br>9 |
| 13<br>6 | MF | GO:0046906~tetrapyrrole binding                                                                    | CYP24A1, SUOX, CYP4A12A, CUBN, CYP2C44, CYP2J11, FADS2, CYP2D26, CYP4A14                                                                                                                                                                                                                                                                                                                                                                                                                                                                                                           | 0.0030845<br>3 |
| 13<br>7 | MF | GO:0005328~neurotransmitter:sodium symporter activity                                              | SLC6A20B, SLC6A13, SLC6A4, SLC6A19                                                                                                                                                                                                                                                                                                                                                                                                                                                                                                                                                 | 0.0038354<br>6 |
| 13<br>8 | MF | GO:0005343~organic acid:sodium symporter activity                                                  | SLC6A13, SLC13A3, SLC10A2, SLC1A1                                                                                                                                                                                                                                                                                                                                                                                                                                                                                                                                                  | 0.0050601<br>6 |
| 13<br>9 | MF | GO:0005326~neurotransmitter transporter activity                                                   | SLC6A20B, SLC6A13, SLC6A4, SLC6A19                                                                                                                                                                                                                                                                                                                                                                                                                                                                                                                                                 | 0.0050601<br>6 |
| 14<br>0 | MF | GO:0016405~CoA-ligase activity                                                                     | ACSM1, ACSS1, ACSS2                                                                                                                                                                                                                                                                                                                                                                                                                                                                                                                                                                | 0.0086262<br>8 |
| 14<br>1 | MF | GO:0020037~heme binding                                                                            | CYP24A1, SUOX, CYP4A12A, CYP2C44, CYP2J11, FADS2, CYP2D26, CYP4A14                                                                                                                                                                                                                                                                                                                                                                                                                                                                                                                 | 0.0087349<br>7 |
| 14<br>2 | MF | GO:0016646~oxidoreductase activity, acting on the CH-NH group of donors, NAD or NADP as acceptor   | MTHFD1, QDPR, ALDH4A1                                                                                                                                                                                                                                                                                                                                                                                                                                                                                                                                                              | 0.0236150<br>4 |
| 14<br>3 | MF | GO:0016701~oxidoreductase activity, acting on single donors with incorporation of molecular oxygen | MIOX, HAAO, HGD, TET1, HPD                                                                                                                                                                                                                                                                                                                                                                                                                                                                                                                                                         | 0.0250672<br>5 |
| 14<br>4 | MF | GO:0043167~ion binding                                                                             | SLC5A2, CYP24A1, GLB1L, GABRB3, SLC5A1, KCNIP2, CALB1, CLYBL, PTER, EFHD1, ASPA, SLC23A1, PVALB, CYP2J11, MIOX, SLC4A4, DPEP1, HPD, SLC12A6, SUOX, EGFL6, CAR12, CMAH, SLC26A4, FOLH1, RAB11FIP3, HNF4A, CYP2D26, RAD18, SLC25A37, CAR4, STEAP1, NEK6, FRAS1, ME3, SORD, ADHFE1, CYP2C44, ENPP3, MME, PAH, KCNJ1, STK32B, CYP4A12A, TCEA3, LHX1, HAAO, GALNT11, EGF, EHD3, NOX4, BHMT2, ACY1, SLC12A1, CUBN, KL, PM20D1, ITGA1, ESRRG, HGD, FADS2, CELSR2, SLC10A2, TET1, PCK1, B3GAT2, ACSM3, ACSM1, RNF152, SLC13A2, MEP1B, SLC5A9, LRP8, SLC13A3, LRP2, CYP4A14, ACSM5, SLC5A12 | 0.0250784<br>5 |
| 14<br>5 | MF | GO:0005496~steroid binding                                                                         | HNF4A, ESRRG, HSD11B2, CALB1                                                                                                                                                                                                                                                                                                                                                                                                                                                                                                                                                       | 0.0280338<br>6 |

|    |    |                                                                                                                                                                                                        |                                                                                                                                                                                                                                                                                                                                                                                                                                                                                                                                                                   |           |
|----|----|--------------------------------------------------------------------------------------------------------------------------------------------------------------------------------------------------------|-------------------------------------------------------------------------------------------------------------------------------------------------------------------------------------------------------------------------------------------------------------------------------------------------------------------------------------------------------------------------------------------------------------------------------------------------------------------------------------------------------------------------------------------------------------------|-----------|
| 14 | MF | GO:0005104~fibroblast growth factor receptor binding                                                                                                                                                   | KL, IL1RN, FGF1                                                                                                                                                                                                                                                                                                                                                                                                                                                                                                                                                   | 0.0299511 |
| 6  |    |                                                                                                                                                                                                        |                                                                                                                                                                                                                                                                                                                                                                                                                                                                                                                                                                   | 7         |
| 14 | MF | GO:0005412~glucose:sodium symporter activity                                                                                                                                                           | SLC5A2, SLC5A1                                                                                                                                                                                                                                                                                                                                                                                                                                                                                                                                                    | 0.0319513 |
| 7  |    |                                                                                                                                                                                                        |                                                                                                                                                                                                                                                                                                                                                                                                                                                                                                                                                                   | 4         |
| 14 | MF | GO:0003858~3-hydroxybutyrate dehydrogenase activity                                                                                                                                                    | BDH2, BDH1                                                                                                                                                                                                                                                                                                                                                                                                                                                                                                                                                        | 0.0319513 |
| 8  |    |                                                                                                                                                                                                        |                                                                                                                                                                                                                                                                                                                                                                                                                                                                                                                                                                   | 4         |
| 14 | MF | GO:0003884~D-amino-acid oxidase activity                                                                                                                                                               | DAO, DDO                                                                                                                                                                                                                                                                                                                                                                                                                                                                                                                                                          | 0.0319513 |
| 9  |    |                                                                                                                                                                                                        |                                                                                                                                                                                                                                                                                                                                                                                                                                                                                                                                                                   | 4         |
| 15 | MF | GO:0051183~vitamin transporter activity                                                                                                                                                                | SLC23A1, SLC2A2, SLC46A1                                                                                                                                                                                                                                                                                                                                                                                                                                                                                                                                          | 0.0333436 |
| 0  |    |                                                                                                                                                                                                        |                                                                                                                                                                                                                                                                                                                                                                                                                                                                                                                                                                   | 7         |
| 15 | MF | GO:0051287~NAD or NADH binding                                                                                                                                                                         | ME3, HSD11B2, BDH2, HIBADH                                                                                                                                                                                                                                                                                                                                                                                                                                                                                                                                        | 0.0336368 |
| 1  |    |                                                                                                                                                                                                        |                                                                                                                                                                                                                                                                                                                                                                                                                                                                                                                                                                   | 3         |
| 15 | MF | GO:0016712~oxidoreductase activity, acting on paired donors, with incorporation or reduction of molecular oxygen, reduced flavin or flavoprotein as one donor, and incorporation of one atom of oxygen | CYP4A12A, CYP2C44, CYP2J11, CYP2D26                                                                                                                                                                                                                                                                                                                                                                                                                                                                                                                               | 0.0336368 |
| 2  |    |                                                                                                                                                                                                        |                                                                                                                                                                                                                                                                                                                                                                                                                                                                                                                                                                   | 3         |
| 15 | MF | GO:0043169~cation binding                                                                                                                                                                              | SLC5A2, CYP24A1, GLB1L, SLC5A1, KCNIP2, CALB1, CLYBL, PTER, EFHD1, ASPA, SLC23A1, PVALB, CYP2J11, MIOX, SLC4A4, DPEP1, HPD, SLC12A6, SUOX, EGFL6, CAR12, CMAH, FOLH1, RAB11FIP3, HNF4A, CYP2D26, RAD18, SLC25A37, CAR4, STEAP1, NEK6, FRAS1, ME3, SORD, ADHFE1, CYP2C44, ENPP3, MME, PAH, KCNJ1, STK32B, CYP4A12A, TCEA3, LHX1, HAAO, GALNT11, EGF, EHD3, NOX4, BHMT2, ACY1, SLC12A1, CUBN, KL, PM20D1, ITGA1, ESRRG, HGD, FADS2, CELSR2, SLC10A2, TET1, PCK1, B3GAT2, ACSM3, ACSM1, RNF152, SLC13A2, MEP1B, SLC5A9, LRP8, SLC13A3, LRP2, CYP4A14, ACSM5, SLC5A12 | 0.0369175 |
| 3  |    |                                                                                                                                                                                                        |                                                                                                                                                                                                                                                                                                                                                                                                                                                                                                                                                                   | 7         |
| 15 | MF | GO:0008201~heparin binding                                                                                                                                                                             | FGF9, APOH, BMP7, FGF1, CYR61                                                                                                                                                                                                                                                                                                                                                                                                                                                                                                                                     | 0.0448919 |
| 4  |    |                                                                                                                                                                                                        |                                                                                                                                                                                                                                                                                                                                                                                                                                                                                                                                                                   | 5         |
| 15 | MF | GO:0019842~vitamin binding                                                                                                                                                                             | AADAT, SHMT1, CUBN, ABAT, CALB1, SLC46A1                                                                                                                                                                                                                                                                                                                                                                                                                                                                                                                          | 0.0459225 |
| 5  |    |                                                                                                                                                                                                        |                                                                                                                                                                                                                                                                                                                                                                                                                                                                                                                                                                   | 2         |
| 15 | MF | GO:0051739~ammonia transporter activity                                                                                                                                                                | RHCG, RHBG                                                                                                                                                                                                                                                                                                                                                                                                                                                                                                                                                        | 0.0475438 |
| 6  |    |                                                                                                                                                                                                        |                                                                                                                                                                                                                                                                                                                                                                                                                                                                                                                                                                   | 8         |
| 15 | MF | GO:0005520~insulin-like growth factor binding                                                                                                                                                          | IGFBP4, CYR61, IGFBP5                                                                                                                                                                                                                                                                                                                                                                                                                                                                                                                                             | 0.0482819 |
| 7  |    |                                                                                                                                                                                                        |                                                                                                                                                                                                                                                                                                                                                                                                                                                                                                                                                                   | 4         |
| 15 | MF | GO:0016651~oxidoreductase activity, acting on NADH or NADPH                                                                                                                                            | NOX4, NNT, MIOX, NQO1                                                                                                                                                                                                                                                                                                                                                                                                                                                                                                                                             | 0.0487789 |
| 8  |    |                                                                                                                                                                                                        |                                                                                                                                                                                                                                                                                                                                                                                                                                                                                                                                                                   | 5         |
