# Supplementary material for: Upregulation of FABP7 inhibits acute kidney injury-induced TCMK-1 cell apoptosis via activating the PPAR gamma signalling pathway
Source: Royal Society of Chemistry journal article supplement (doi:10.1039/d0mo00056f), 2020-08-12
Supplement: d0mo00056f3.pdf [file d0mo00056f3.pdf]

## SUPPLEMENTARY INFORMATION

Supplementary Table S2. KEGG pathway analysis for the 289 overlapping genes based on DAVID database.

| ID | Category     | Term                                                 | Genes                                               | PValue         |
|----|--------------|------------------------------------------------------|-----------------------------------------------------|----------------|
| 1  | KEGG_PATHWAY | mmu00650:Butanoate metabolism                        | ACSM3, ACSM1, AKR1E1, ABAT, BDH2, BDH1, ACSM5       | 4.77E-05       |
| 2  | KEGG_PATHWAY | mmu00260:Glycine, serine and threonine metabolism    | GLYCTK, SHMT1, GATM, DAO, SARDH                     | 0.0025669<br>7 |
| 3  | KEGG_PATHWAY | mmu03320:PPAR signaling pathway                      | CYP4A12A, FADS2, FABP7, CYP4A14, ADIPOQ, SCP2, PCK1 | 0.0030684      |
| 4  | KEGG_PATHWAY | mmu00010:Glycolysis / Gluconeogenesis                | GALM, G6PC, ACSS1, PGAM2, ACSS2, PCK1               | 0.0078012<br>7 |
| 5  | KEGG_PATHWAY | mmu00982:Drug metabolism                             | GSTA4, CYP2C44, FMO1, GSTZ1, CYP2D26, GSTM7         | 0.0116842<br>3 |
| 6  | KEGG_PATHWAY | mmu00920:Sulfur metabolism                           | SUOX, CHST11, PAPSS2                                | 0.0135628<br>8 |
| 7  | KEGG_PATHWAY | mmu00330:Arginine and proline metabolism             | ACY1, GATM, ALDH4A1, DAO, PRODH                     | 0.0156037      |
| 8  | KEGG_PATHWAY | mmu00250:Alanine, aspartate and glutamate metabolism | ASPA, ABAT, ALDH4A1, DDO                            | 0.0168924<br>4 |
| 9  | KEGG_PATHWAY | mmu00603:Glycosphingolipid biosynthesis              | FUT9, B3GALT5, ST8SIA1                              | 0.0261541<br>2 |
| 10 | KEGG_PATHWAY | mmu00500:Starch and sucrose metabolism               | G6PC, ENPP3, MGAM, GYS2                             | 0.0274608<br>1 |
| 11 | KEGG_PATHWAY | mmu04920:Adipocytokine signaling pathway             | G6PC, SLC2A4, ADIPOQ, PPARGC1A, PCK1                | 0.0336754<br>5 |
| 12 | KEGG_PATHWAY | mmu00630:Glyoxylate and dicarboxylate metabolism     | GLYCTK, MTHFD1, HAO2                                | 0.0336825<br>2 |
| 13 | KEGG_PATHWAY | mmu00830:Retinol metabolism                          | ALDH1A1, CYP4A12A, CYP2C44, CYP4A14, RDH16          | 0.0352925<br>8 |
| 14 | KEGG_PATHWAY | mmu00620:Pyruvate metabolism                         | ACSS1, ME3, ACSS2, PCK1                             | 0.0384107<br>7 |
